# Supplementary material
Source: PubMed Central journal article supplement (PMC3957663)
Supplement: CVI.00818-13_zcd999094936so1.pdf [file CVI.00818-13_zcd999094936so1.pdf]

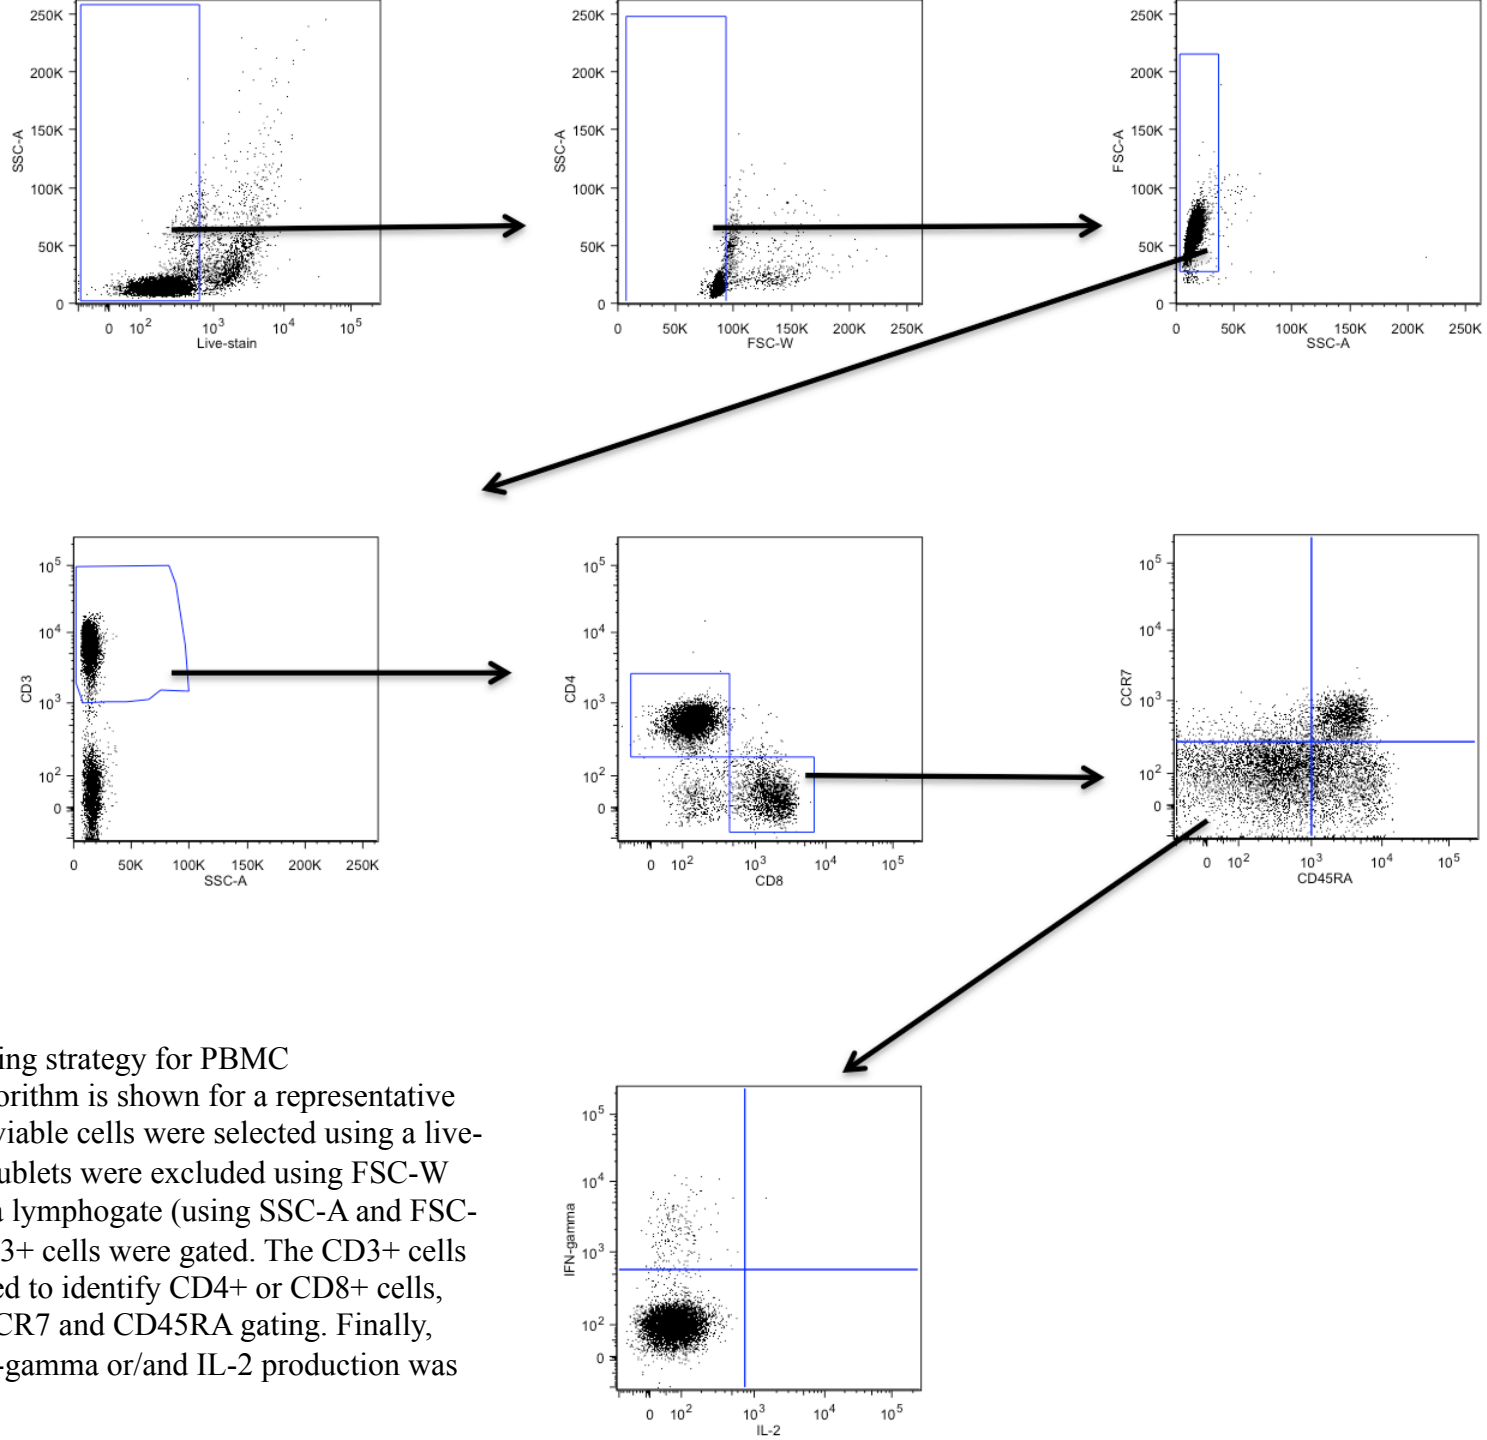

Figure S1. Gating strategy for PBMC

The gating algorithm is shown for a representative sample. First, viable cells were selected using a live-stain. Next, doublets were excluded using FSC-W criteria. After a lymphogate (using SSC-A and FSC-A criteria), CD3+ cells were gated. The CD3+ cells are further gated to identify CD4+ or CD8+ cells, followed by CCR7 and CD45RA gating. Finally, gating for IFN-gamma or/and IL-2 production was performed.

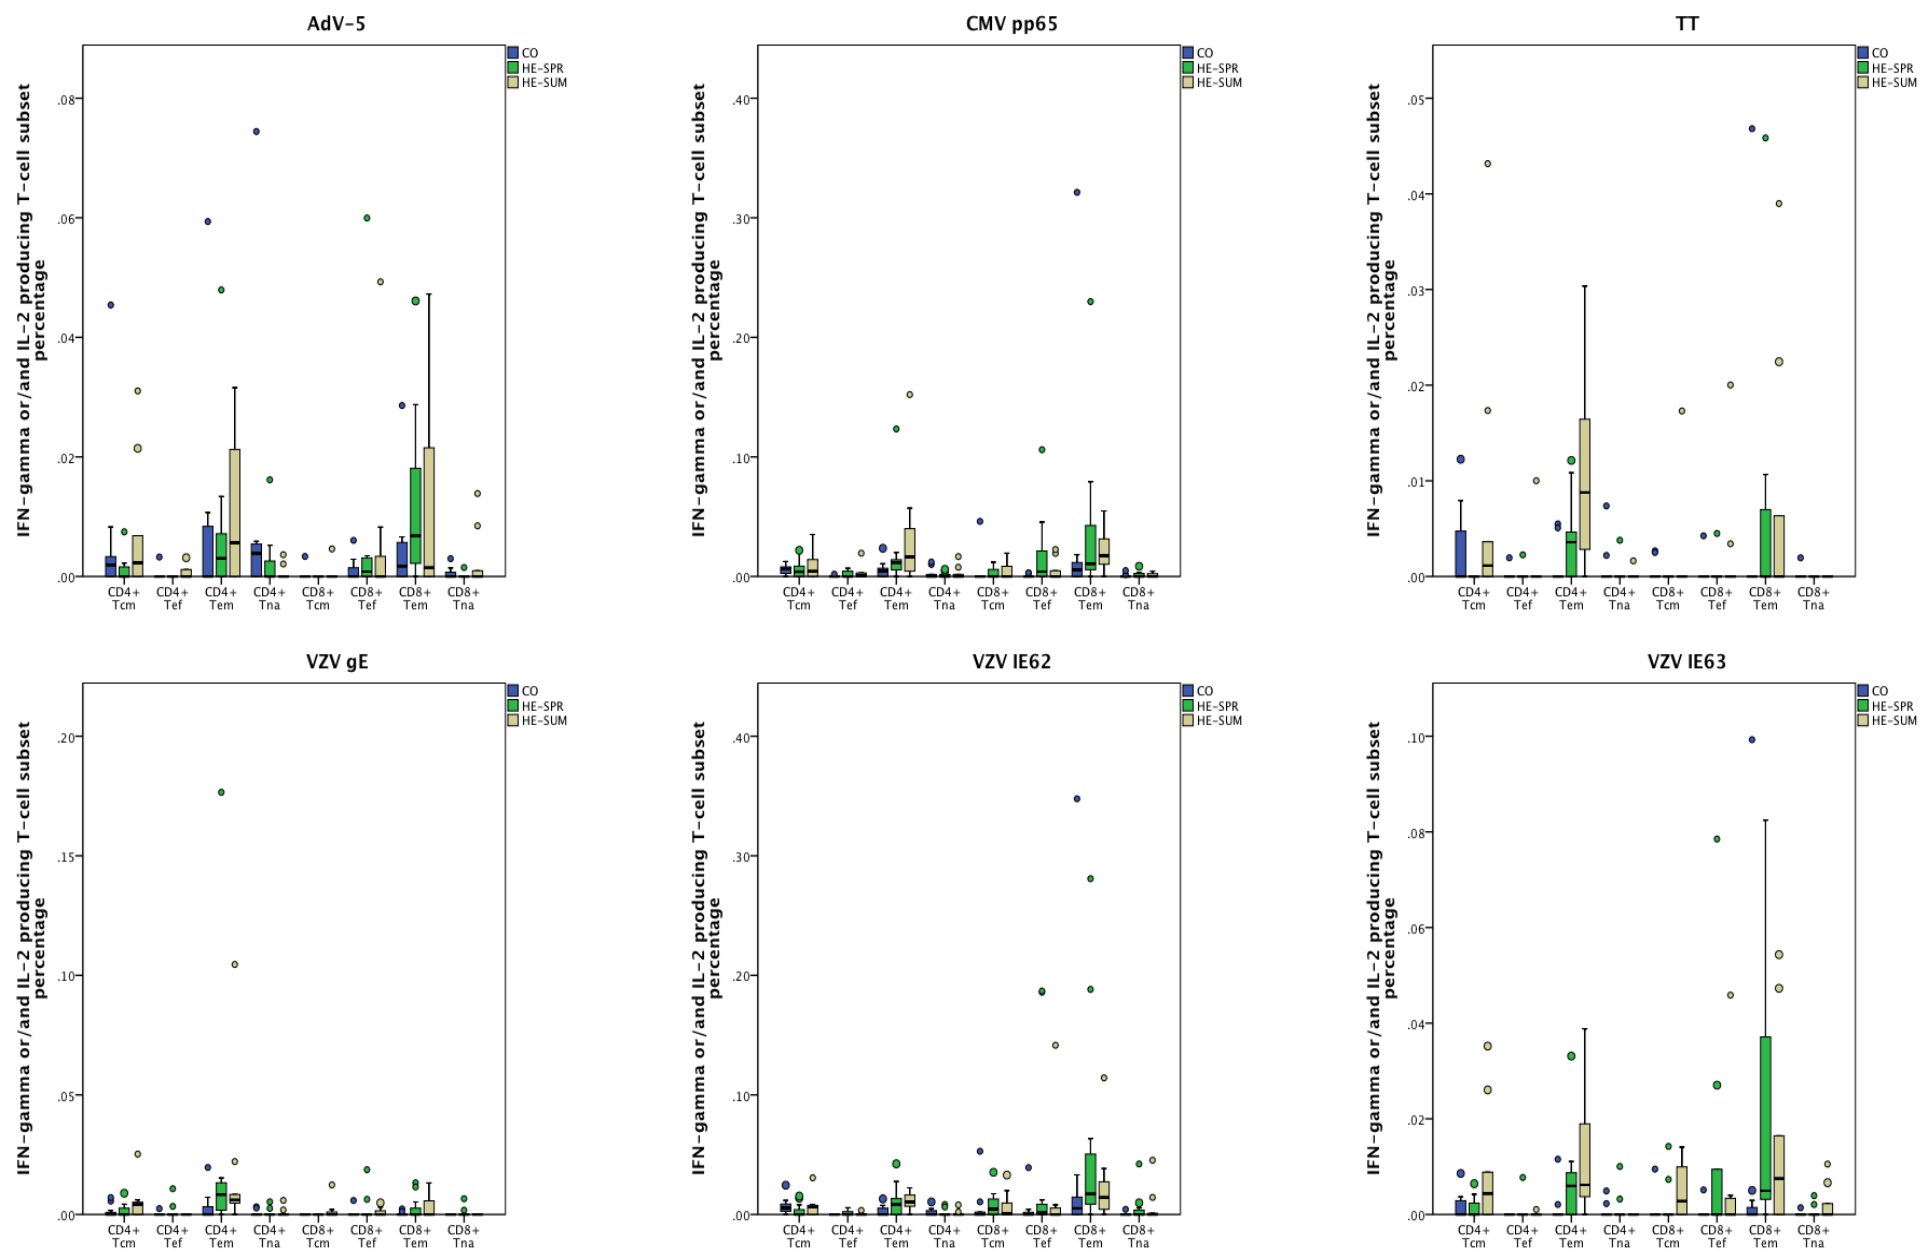

Figure S2. Comparing differences in IFN-gamma or/and IL-2 producing T-cell subsets between sampling groups. A box plot representation (with median as horizontal line, interquartile range as box, range as vertical line and outliers as dots) is used to compare T-cell subset percentages (of CD3+ PBMC) for the three different sampling groups for each antigen. See Table A1 for P values.
